# Supplementary material for: The Economic Burden of Brain Disability in Korea, 2008-2011
Source: PubMed Central journal article supplement — Inquiry. 2020 Jul 2;57:0046958020936396. doi: 10.1177/0046958020936396 (PMC7333489; doi:10.1177/0046958020936396), 2020-07-02
Supplement: supplementary_file.pdf [file supplementary_file.pdf]

Appendix 1. The category of brain disability diseases

| ICD-10  | Disease                                                                         |
|---------|---------------------------------------------------------------------------------|
| I60-I69 | cerebrovascular diseases                                                        |
| G80-G83 | cerebral palsy and other paralytic syndromes                                    |
| G20-G26 | extrapyramidal and movement disorders                                           |
| S00-S09 | injuries to the head                                                            |
| G90-G99 | other disorders of the nervous system                                           |
| G10-G14 | systemic atrophies primarily affecting the central nervous system               |
| G30-G32 | other degenerative diseases of the nervous system                               |
| T90-T98 | sequelae of injuries, of poisoning and of other consequences of external causes |
| Q00-Q07 | congenital malformations of the nervous system                                  |
| G35-G37 | demyelinating diseases of the central nervous system                            |
| Q90-Q99 | chromosomal abnormalities, not elsewhere classified                             |
| H46-H48 | disorders of optic nerve and visual pathways                                    |
| A80-A89 | viral infections of the central nervous system                                  |
| V10-V19 | pedal cyclist injured in transport accident                                     |
| P90-P96 | other disorders originating in the perinatal period                             |
| P05-P08 | disorders related to length of gestation and fetal growth                       |
| V20-V29 | motorcycle rider injured in transport accident                                  |
| P10-P15 | Birth trauma                                                                    |
| V01-V09 | pedestrian injured in transport accident                                        |
| W00-W19 | falls                                                                           |
| V40-V49 | car occupant injured in transport accident                                      |
| V98-V99 | other and unspecified transport accidents                                       |
